# Supplementary material for: Prodynorphin and Proenkephalin in Cerebrospinal Fluid of Sporadic Creutzfeldt–Jakob Disease
Source: MDPI journal article supplement (doi:10.3390/ijms23042051), 2022-02-12

## SUPPLEMENTARY MATERIALS

### Supplementary results

In the whole cohort age did not influence levels of PDYN peptide [SVG...LAR] ( $r=0.071$ ,  $p=0.509$ ), PDYN peptide [FLP...STR] ( $r=0.178$ ,  $p=0.097$ ), PENK peptide [DAE...LLK] ( $r=-0.160$ ,  $p=0.198$ ), PENK peptide [FAE...YSK] ( $r=0.063$ ,  $p=0.560$ ). Similarly, there was no association between sex and levels of PDYN peptide [SVG...LAR] ( $p=0.434$ ), PDYN peptide [FLP...STR] ( $p=0.476$ ), PENK peptide [DAE...LLK] ( $p=0.444$ ), PENK peptide [FAE...YSK] ( $p=0.449$ ).

PENK peptide [DAE...LLK] was significantly lower in CJD than controls even after age-adjustment ( $\beta=-0.374$ ,  $p=0.002$ ), while the other peptides did not differ between CJD and controls. Mean PENK but not mean PDYN was significantly lower in CJD compared to controls ( $p=0.001$ ).

After age-adjustment, the MV2K group showed significantly lower PDYN [SVG...LAR] levels compared to the VV2 ( $\beta=-0.304$ ,  $p=0.044$ ) group and significantly lower PDYN [FLP...STR] levels than the VV2 ( $\beta=-0.291$ ,  $p=0.042$ ) and MM(V)1 ( $\beta=-0.251$ ,  $p=0.048$ ) groups. PDYN peptides were significantly lower in MV2K patients than in controls ([SVG...LAR]:  $\beta=-0.362$ ,  $p=0.023$ , [FLP...STR]:  $\beta=-0.242$ ,  $p=0.049$ ). Mean PDYN was lower in MV2K compared to VV2 ( $p=0.025$ ) and MM(V)1 ( $p=0.039$ ) and controls ( $p=0.027$ ). PENK [DAE...LLK] and [FAE...YSK] peptide levels did not differ among the most prevalent CJD subtypes. However, the PENK [DAE...LLK] peptide was significantly decreased in each CJD subtype compared to controls after age-adjustment (MM(V)1:  $\beta=-0.518$ ,  $p=0.001$ , VV2:  $\beta=-0.382$ ,  $p=0.026$ , MV2K:  $\beta=-0.308$ ,  $p=0.041$ ).

**Table S1. Diagnostic accuracy (AUC values) of CSF PDYN and PENK peptides in the distinction between sCJD subtypes and controls.**

| AUC                      | PDYN [SVG...LAR]<br>L/H ratio | PDYN [FLP...STR]<br>L/H ratio | PENK [DAE...LLK]<br>L/H ratio | PENK [FAE...YSK]<br>L/H ratio |
|--------------------------|-------------------------------|-------------------------------|-------------------------------|-------------------------------|
| sCJD all vs. controls    | 0.605±0.068                   | 0.479±0.067                   | 0.768±0.061                   | 0.516±0.073                   |
| sCJD MM(V)1 vs. controls | 0.622±0.098                   | 0.583±0.100                   | 0.844±0.077                   | 0.575±0.102                   |
| sCJD VV2 vs. controls    | 0.515±0.097                   | 0.426±0.096                   | 0.741±0.089                   | 0.482±0.103                   |
| sCJD MV2K vs. controls   | 0.704±0.088                   | 0.619±0.095                   | 0.711±0.100                   | 0.469±0.106                   |
| sCJD MM(V)1 vs. VV2      | 0.621±0.109                   | 0.638±0.103                   | 0.563±0.109                   | 0.558±0.108                   |
| sCJD MM(V)1 vs. MV2K     | 0.602±0.107                   | 0.538±0.110                   | 0.400±0.109                   | 0.362±0.104                   |
| sCJD VV2 vs. MV2K        | 0.704±0.088                   | 0.619±0.098                   | 0.711±0.100                   | 0.469±0.106                   |

**Table S2. Median levels and interquartile ranges of CSF biomarkers in sCJD patients.**

| Diagnosis         | sCJD                 |
|-------------------|----------------------|
| N                 | 63                   |
| t-tau<br>(pg/ml)  | 4501 (2270-10400)    |
| NfL<br>(pg/ml)    | 8582 (4943-12225)    |
| 14-3-3<br>(AU/ml) | 77450 (29200-156350) |
| YKL-40<br>(pg/ml) | 368 (274-487)        |

Table S3.

| Diagnosis                                             | MM(V)1           | VV2              | MV2K              |
|-------------------------------------------------------|------------------|------------------|-------------------|
| N                                                     | 28               | 20               | 15                |
| Age at LP<br>(years $\pm$ SD)                         | 70.39 $\pm$ 9.57 | 71.70 $\pm$ 7.90 | 67.93 $\pm$ 6.05  |
| Female (%)                                            | 53.6             | 35.0             | 66.7              |
| Time from symptom onset to<br>LP<br>(months $\pm$ SD) | 1.95 $\pm$ 1.25  | 3.28 $\pm$ 1.13  | 6.19 $\pm$ 3.80   |
| Survival<br>(months $\pm$ SD)                         | 3.25 $\pm$ 1.47  | 5.57 $\pm$ 2.08  | 17.46 $\pm$ 14.86 |
| Presenting symptom(s)* (%):                           |                  |                  |                   |
| Cognitive                                             | 16 (57.1)        | 5 (25.0)         | 9 (60.0)          |
| Ataxia                                                | 7 (25.0)         | 18 (90.0)        | 6 (40.0)          |
| Oculomotor                                            | 0 (0)            | 3 (15.0)         | 1 (6.7)           |
| Psychiatric                                           | 3 (10.7)         | 1 (5.0)          | 1 (6.7)           |
| Extrapyramidal                                        | 2 (7.1)          | 0 (0)            | 1 (6.7)           |
| Pyramidal                                             | 2 (7.1)          | 0 (0)            | 0 (0)             |
| CSF 14-3-3 protein<br>(positive/tested, %)            | 26/28 (92.8)     | 20/20 (100)      | 5/15 (33.3)       |
| EEG PSWCs<br>(positive/tested, %)                     | 17/25 (68.0)     | 3/17 (17.6)      | 0/12 (0)          |
| Typical MRI<br>(positive/tested, %)                   | 17/21 (80.9)     | 12/14 (85.7)     | 8/9 (88.9)        |
| CSF prion RT-QuIC<br>(positive/tested, %)             | 27/28 (96.4)     | 20/20 (100)      | 14/15 (93.3)      |

\*Symptoms occurred in less than 2 patients in the overall sCJD cohort were not included.

**Figure S1. Correlations between CSF PDYN and PENK peptides and CSF biomarkers of neurodegeneration.** Significant spearman rank correlations between CSF PDYN and PENK peptides and CSF t-tau, 14-3-3 protein and NfL are shown in panels A-E.

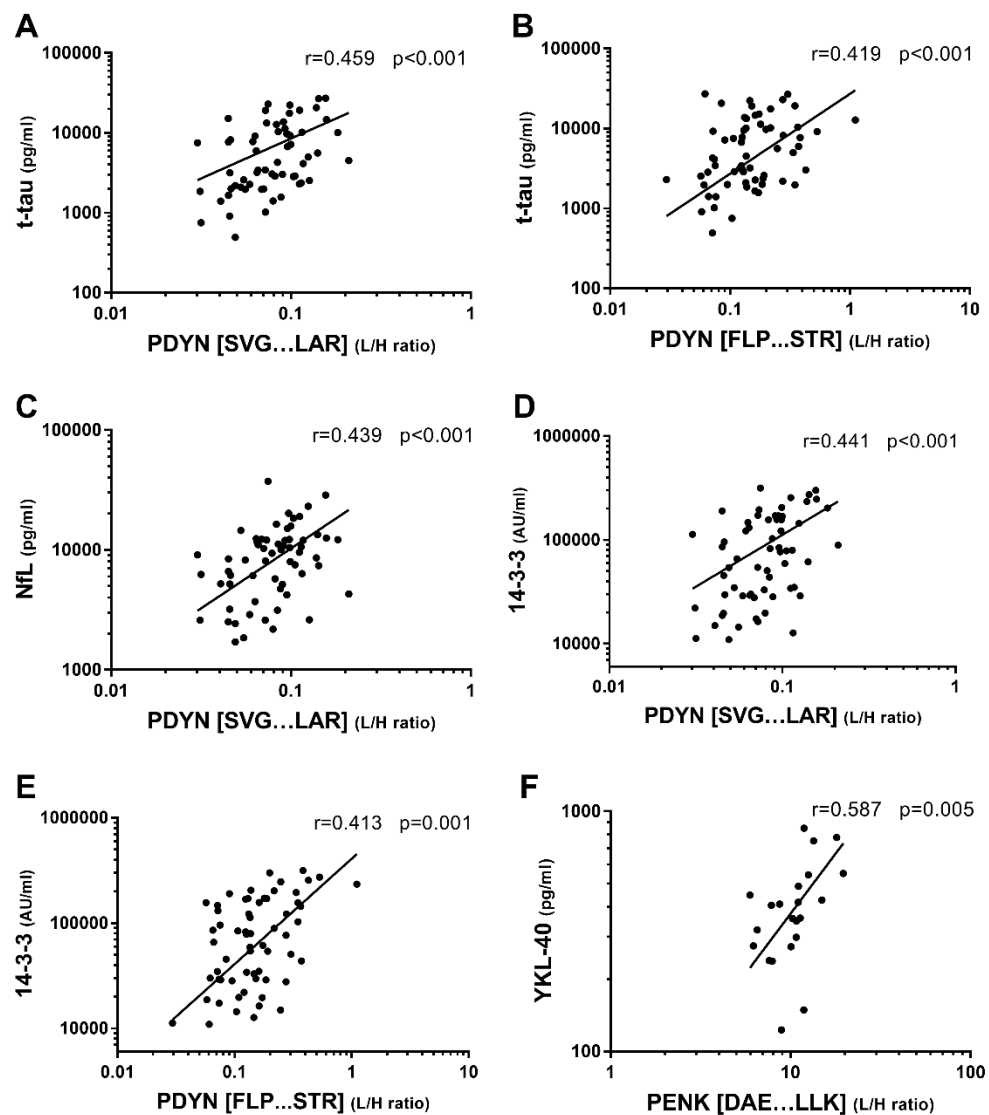

## **Supplementary Methods**

200 microliters of CSF sample were mixed with 12  $\mu\text{L}$  internal standard solution containing heavy labelled peptides and 20  $\mu\text{L}$  1M triethylammonium bicarbonate. Reduction and alkylation were conducted with 20  $\mu\text{L}$  1M tris(2-carboxyethyl) phosphine and 2  $\mu\text{L}$  200 mM chloroacetamide for 10 min at 95°C and 400 rpm. Samples were digested with 10  $\mu\text{L}$  trypsin/Lys-C solution (0.1  $\mu\text{g}/\mu\text{L}$ ) for 18 hours at 37°C and 400 rpm. The reaction was stopped by adding trifluoroacetic acid (TFA) to a final concentration of 1%. Samples were fractionated using in-house prepared strong cation exchange STAGE tips. Peptides were eluted with an increasing concentration of ammonium acetate as follows: 125mM ammonium acetate/ 20% acetonitrile/ 0.5% formic acid (fraction 1), 160mM ammonium acetate/ 20% acetonitrile/ 0.5% formic acid (fraction 2), 225mM ammonium acetate/ 20% acetonitrile/ 0.5% formic acid (fraction 3), 300mM ammonium acetate/ 20% acetonitrile/ 0.5% formic acid (fraction 4), 450 mM ammonium acetate/ 20% acetonitrile/ 0.5% formic acid (fraction 5) and 5% ammonium hydroxide/ 80% acetonitrile (fraction 6). Eluates of fractions one, two and five were dried by vacuum centrifugation and dissolved in 27.5  $\mu\text{L}$  0.5% TFA/6% ACN for MS analysis. Further MRM methods are provided in the Table S1.

Table S4: MRM methods

| Fraction 1     |                  |          |                                                   |    |    |      |     |     |
|----------------|------------------|----------|---------------------------------------------------|----|----|------|-----|-----|
| Precursor mass | Product ion mass | RT (min) | Peptide                                           | DP | EP | CE   | CXP | ST1 |
| 861.39         | 960.54           | 7.6      | sp P01210 PENK_HUMAN.DAEEDDSLANSDDLK.+2y9.light   | 90 | 11 | 42.9 | 49  | -22 |
| 816.39         | 776.41           | 7.6      | sp P01210 PENK_HUMAN.DAEEDDSLANSDDLK.+2y7.light   | 90 | 11 | 42.9 | 41  | -22 |
| 816.39         | 316.11           | 7.6      | sp P01210 PENK_HUMAN.DAEEDDSLANSDDLK.+2b3.light   | 90 | 11 | 42.9 | 20  | -22 |
| 865.40         | 968.55           | 7.6      | sp P01210 PENK_HUMAN.DAEEDDSLANSDDLK.+2y9.heavy   | 90 | 11 | 42.9 | 49  | -22 |
| 865.40         | 784.43           | 7.6      | sp P01210 PENK_HUMAN.DAEEDDSLANSDDLK.+2y7.heavy   | 90 | 11 | 42.9 | 41  | -22 |
| 865.40         | 316.11           | 7.6      | sp P01210 PENK_HUMAN.DAEEDDSLANSDDLK.+2b3.heavy   | 90 | 11 | 42.9 | 20  | -22 |
| 879.89         | 1227.50          | 6.1      | sp P01210 PENK_HUMAN.FAEALPSDEEGESYSK.+2y11.light | 90 | 11 | 43.7 | 55  | -22 |
| 879.89         | 348.16           | 6.1      | sp P01210 PENK_HUMAN.FAEALPSDEEGESYSK.+2b3.light  | 90 | 11 | 43.7 | 21  | -22 |
| 879.89         | 419.19           | 6.1      | sp P01210 PENK_HUMAN.FAEALPSDEEGESYSK.+2b4.light  | 90 | 11 | 43.7 | 24  | -22 |
| 883.90         | 1235.52          | 6.1      | sp P01210 PENK_HUMAN.FAEALPSDEEGESYSK.+2y11.heavy | 90 | 11 | 43.7 | 55  | -22 |
| 883.90         | 348.16           | 6.1      | sp P01210 PENK_HUMAN.FAEALPSDEEGESYSK.+2b3.heavy  | 90 | 11 | 43.7 | 21  | -22 |
| 883.90         | 419.19           | 6.1      | sp P01210 PENK_HUMAN.FAEALPSDEEGESYSK.+2b4.heavy  | 90 | 11 | 43.7 | 24  | -22 |
| Fraction 2     |                  |          |                                                   |    |    |      |     |     |
| Precursor mass | Product ion mass | RT (min) | Peptide                                           | DP | EP | CE   | CXP | ST1 |
| 618.81         | 1050.51          | 5.5      | sp P01213_1 PDYN_HUMAN.SVGEGPYSELAK.+2y10.light   | 90 | 10 | 32.2 | 53  | -22 |
| 618.81         | 864.45           | 5.5      | sp P01213_1 PDYN_HUMAN.SVGEGPYSELAK.+2y8.light    | 90 | 10 | 32.2 | 44  | -22 |
| 618.81         | 807.42           | 5.5      | sp P01213_1 PDYN_HUMAN.SVGEGPYSELAK.+2y7.light    | 90 | 10 | 32.2 | 42  | -22 |
| 618.81         | 432.73           | 5.5      | sp P01213_1 PDYN_HUMAN.SVGEGPYSELAK.+2y8+2.light  | 90 | 10 | 32.2 | 25  | -22 |
| 622.82         | 1058.52          | 5.5      | sp P01213_1 PDYN_HUMAN.SVGEGPYSELAK.+2y10.heavy   | 90 | 10 | 32.2 | 53  | -22 |
| 622.82         | 872.46           | 5.5      | sp P01213_1 PDYN_HUMAN.SVGEGPYSELAK.+2y8.heavy    | 90 | 10 | 32.2 | 45  | -22 |
| 622.82         | 815.44           | 5.5      | sp P01213_1 PDYN_HUMAN.SVGEGPYSELAK.+2y7.heavy    | 90 | 10 | 32.2 | 42  | -22 |
| 622.82         | 436.73           | 5.5      | sp P01213_1 PDYN_HUMAN.SVGEGPYSELAK.+2y8+2.heavy  | 90 | 10 | 32.2 | 25  | -22 |

| Fraction 5     |                  |          |                                              |    |    |      |     |     |
|----------------|------------------|----------|----------------------------------------------|----|----|------|-----|-----|
| Precursor mass | Product ion mass | RT (min) | Peptide                                      | DP | EP | CE   | CXP | ST1 |
| 446.76         | 745.45           | 6.2      | sp P01213_1 PDYN_HUMAN.FLPSISTK.+2y7.light   | 75 | 10 | 24.7 | 29  | -14 |
| 446.76         | 632.36           | 6.2      | sp P01213_1 PDYN_HUMAN.FLPSISTK.+2y6.light   | 75 | 10 | 24.7 | 34  | -14 |
| 446.76         | 535.31           | 6.2      | sp P01213_1 PDYN_HUMAN.FLPSISTK.+2y5.light   | 75 | 10 | 24.7 | 30  | -14 |
| 446.76         | 316.68           | 6.2      | sp P01213_1 PDYN_HUMAN.FLPSISTK.+2y6+2.light | 75 | 10 | 24.7 | 20  | -14 |
| 450.77         | 753.46           | 6.2      | sp P01213_1 PDYN_HUMAN.FLPSISTK.+2y7.heavy   | 75 | 10 | 24.7 | 40  | -14 |
| 450.77         | 640.38           | 6.2      | sp P01213_1 PDYN_HUMAN.FLPSISTK.+2y6.heavy   | 75 | 10 | 24.7 | 34  | -14 |
| 450.77         | 543.32           | 6.2      | sp P01213_1 PDYN_HUMAN.FLPSISTK.+2y5.heavy   | 75 | 10 | 24.7 | 30  | -14 |
| 450.77         | 320.69           | 6.2      | sp P01213_1 PDYN_HUMAN.FLPSISTK.+2y6+2.heavy | 75 | 10 | 24.7 | 20  | -14 |

RT: retention time; DP: declustering potential; EP: entrance potential; CE: collision energy; CXP: cell exit potential, ST1: prefilter

**Figure S2. Representative sections of striatum and cerebral cortex used for semi-quantitative neuropathologic analysis.** In each section, both astrogliosis and neuronal loss were scored. From the top to the bottom, mild (=1), moderate (=2) and severe (=3) neuropathological changes are shown.

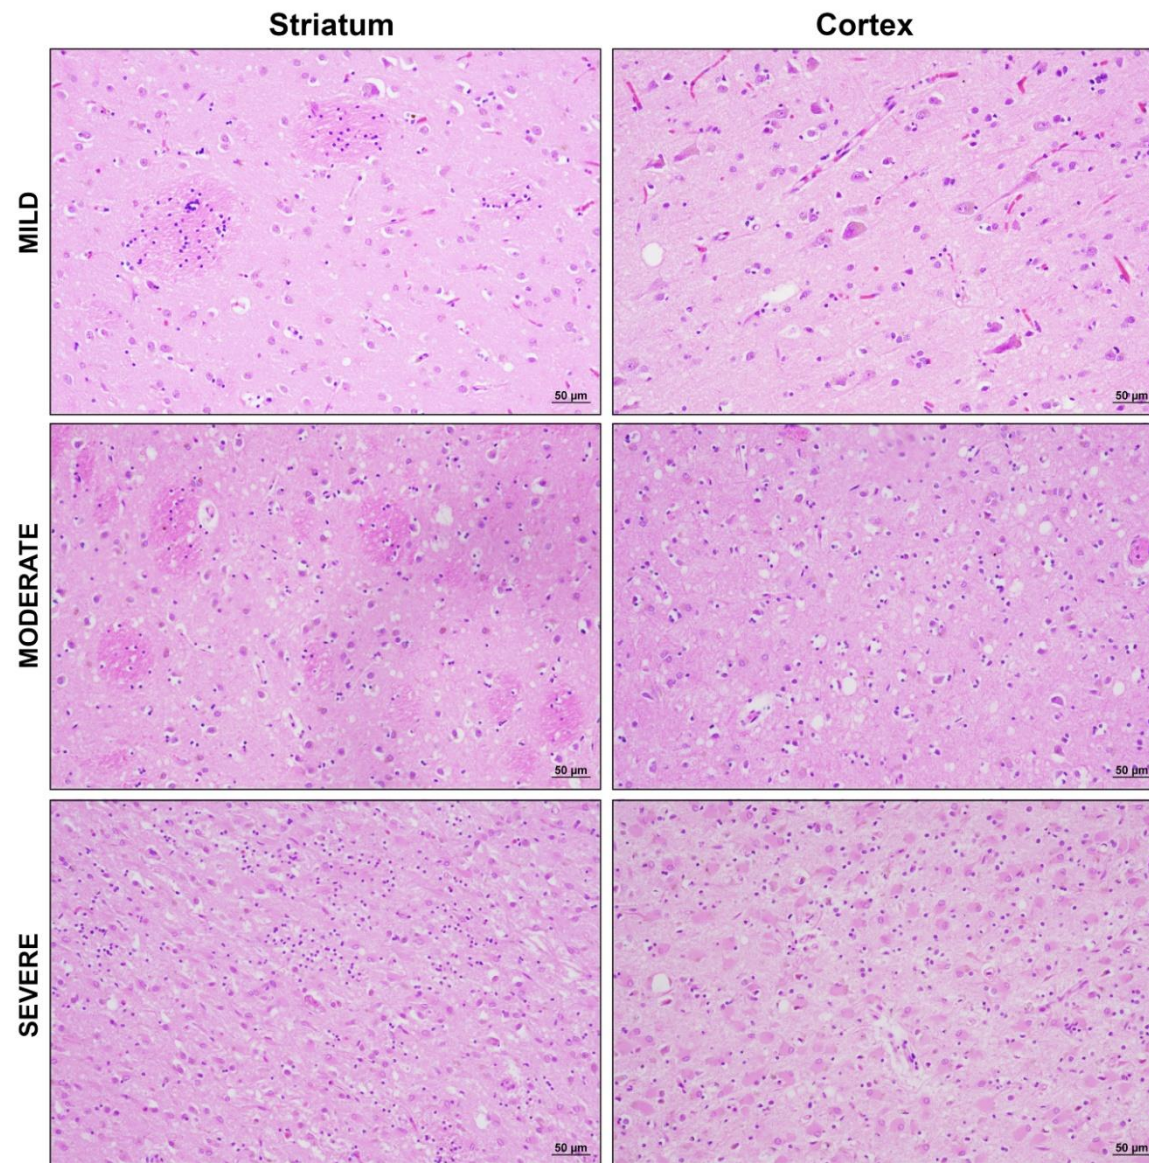

Supplement: s1 [file s1]
